# Supplementary material for: Effect of a Telephone Health Coaching Intervention on Hypertension Control in Young Adults: The MyHEART Randomized Clinical Trial
Source: PubMed Central journal article supplement (PMC9898821; doi:10.1001/jamanetworkopen.2022.55618), 2023-02-03
Supplement: jamanetwopen-e2255618-s002.pdf [file jamanetwopen-e2255618-s002.pdf]

## Supplemental Online Content

Hoppe KK, Smith M, Birstler J, et al. Effect of a telephone health coaching intervention on hypertension control in young adults: the MyHEART randomized clinical trial. *JAMA Netw Open*. 2023;6(2):e2255618. doi:10.1001/jamanetworkopen.2022.55618

**eTable 1.** Baseline Participant Characteristics

**eTable 2.** ASA-24 Dietary Component Evaluation of Sodium, Combined Fruit and Vegetables, Whole Grain, and Saturated Fat Intake, Comparing Baseline With 6 and 12 Months

**eTable 3.** Sensitivity Analyses

This supplemental material has been provided by the authors to give readers additional information about their work.

eTable 1. Baseline Participant Characteristics

| Variable                                       | Overall             | 6-month follow-up   | No 6-month follow-up | p-value |
|------------------------------------------------|---------------------|---------------------|----------------------|---------|
| Total                                          | 316                 | 204                 | 112                  |         |
| Age                                            | 33.8 [18.0-39.0]    | 33.8 [18.0-39.0]    | 33.6 [19.0-39.0]     | 0.541   |
| Alcohol beverages/week                         | 5.2 [0.0-32.0]      | 5.6 [0.0-32.0]      | 4.6 [0.0-30.0]       | 0.192   |
| Ambulatory diastolic BP (mmHg)                 | 86.7 [68.0-120.0]   | 86.6 [68.0-110.0]   | 86.9 [71.0-120.0]    | 0.786   |
| Ambulatory systolic BP (mmHg)                  | 132.8 [108.0-183.0] | 132.6 [108.0-172.0] | 133.2 [110.0-183.0]  | 0.858   |
| Body mass index (kg/m <sup>2</sup> )           | 34.5 [19.3-63.1]    | 34.0 [19.3-61.9]    | 35.3 [19.5-63.1]     | 0.274   |
| Number of children at home                     | 1.0 [0.0-6.0]       | 1.1 [0.0-6.0]       | 0.9 [0.0-6.0]        | 0.56    |
| Office diastolic BP (mmHg)                     | 91.3 [66.0-136.3]   | 90.6 [66.0-130.3]   | 92.6 [74.0-136.3]    | 0.554   |
| Office systolic BP (mmHg)                      | 138.1 [106.0-192.0] | 137.8 [106.0-192.0] | 138.8 [109.7-187.7]  | 0.929   |
| Waist circumference (cm)                       | 109.4 [65.0-178.0]  | 109.0 [65.0-162.0]  | 110.3 [68.0-178.0]   | 0.554   |
| Weight (kg)                                    | 103.2 [45.0-206.0]  | 101.9 [53.0-200.0]  | 105.8 [45.0-206.0]   | 0.446   |
| Cigarette tobacco status                       |                     |                     |                      | 0.003   |
| I currently smoke cigarettes                   | 40 (12.7)           | 17 (8.3)            | 23 (20.5)            |         |
| I have never smoked cigarettes                 | 212 (67.1)          | 149 (73.0)          | 63 (56.2)            |         |
| I used to smoke cigarettes                     | 59 (18.7)           | 38 (18.6)           | 21 (18.8)            |         |
| Godin-Shephard Physical Activity               |                     |                     |                      | 0.95    |
| Active                                         | 149 (47.2)          | 98 (48.0)           | 51 (45.5)            |         |
| Insufficiently active                          | 162 (51.3)          | 106 (52.0)          | 56 (50.0)            |         |
| Highest level of education                     |                     |                     |                      | 0.62    |
| I have not finished high school                | 15 (4.7)            | 11 (5.4)            | 4 (3.6)              |         |
| I have completed high school                   | 42 (13.3)           | 19 (9.3)            | 23 (20.5)            |         |
| I have not finished college or vocation school | 52 (16.5)           | 32 (15.7)           | 20 (17.9)            |         |
| I finished college or vocational school        | 137 (43.4)          | 97 (47.5)           | 40 (35.7)            |         |
| Some/completed Graduate or Professional School | 65 (20.6)           | 45 (22.1)           | 20 (17.9)            |         |
| Marital status                                 |                     |                     |                      | 0.345   |
| Single                                         | 104 (32.9)          | 63 (30.9)           | 41 (36.6)            |         |
| Married/partnered                              | 200 (63.3)          | 137 (67.2)          | 63 (56.2)            |         |

|                                           |            |            |           |         |
|-------------------------------------------|------------|------------|-----------|---------|
| Divorced/widower                          | 7 (2.2)    | 4 (2.0)    | 3 (2.7)   |         |
| Number of antihypertensive medications    |            |            |           | 0.421   |
| 0                                         | 162 (51.3) | 100 (49.0) | 62 (55.4) |         |
| 1                                         | 97 (30.7)  | 66 (32.4)  | 31 (27.7) |         |
| 2                                         | 43 (13.6)  | 28 (13.7)  | 15 (13.4) |         |
| 3                                         | 11 (3.5)   | 9 (4.4)    | 2 (1.8)   |         |
| greater than or equal to 4                | 3 (0.9)    | 1 (0.5)    | 2 (1.8)   |         |
| Race                                      |            |            |           | < 0.001 |
| Black                                     | 72 (22.8)  | 42 (20.6)  | 30 (26.8) |         |
| Other                                     | 22 (7.0)   | 7 (3.4)    | 15 (13.4) |         |
| White non-Hispanic                        | 222 (70.3) | 155 (76.0) | 67 (59.8) |         |
| Self-perceived health status              |            |            |           | 0.352   |
| Excellent                                 | 7 (2.2)    | 5 (2.5)    | 2 (1.8)   |         |
| Very good or good                         | 153 (48.4) | 106 (52.0) | 47 (42.0) |         |
| Fair                                      | 111 (35.1) | 64 (31.4)  | 47 (42.0) |         |
| Poor or no response                       | 39 (12.3)  | 28 (13.7)  | 11 (9.8)  |         |
| Sex                                       |            |            |           | 0.144   |
| Female                                    | 145 (45.9) | 89 (43.6)  | 56 (50.0) |         |
| Male                                      | 166 (52.5) | 115 (56.4) | 51 (45.5) |         |
| Comorbidities                             |            |            |           |         |
| Anxiety and/or depression                 | 160 (50.6) | 99 (48.5)  | 61 (54.5) | 0.313   |
| Chronic kidney disease                    | 3 (0.9)    | 2 (1.0)    | 1 (0.9)   | 0.939   |
| Diabetes                                  | 18 (5.7)   | 12 (5.9)   | 6 (5.4)   | 0.847   |
| Dyslipidemia                              | 73 (23.1)  | 53 (26.0)  | 20 (17.9) | 0.101   |
| Other chronic comorbidity                 | 121 (38.3) | 81 (39.7)  | 40 (35.7) | 0.485   |
| Risk factors                              |            |            |           |         |
| e-cigarette/vaping use in past 6 months   | 26 (8.2)   | 13 (6.4)   | 13 (11.6) | 0.105   |
| Ever been on Medicaid                     | 67 (21.2)  | 39 (19.1)  | 28 (25.0) | 0.221   |
| Family history of heart disease or stroke | 113 (35.8) | 75 (36.8)  | 38 (33.9) | 0.615   |
| Financial status: inadequate income       | 248 (78.5) | 161 (78.9) | 87 (77.7) | 0.797   |

Continuous variables are described by median [range] and tested with Mann-Whitney-Wilcoxon tests. Categorical variables are described by count (percent) and tested with chi-square tests, with the exception of education, number of HTN medications, and self-percieved health status which were ordered and tested with Mann-Whitney-Wilcoxon tests.

eTable 2. ASA-24 Dietary Component Evaluation of Sodium, Combined Fruit and Vegetables, Whole Grain, and Saturated Fat Intake, Comparing Baseline With 6 and 12 Months

| Dietary component evaluated                           | Time     | Arm          | N   | Mean    | Standard deviation | ANCOVA, P-value |
|-------------------------------------------------------|----------|--------------|-----|---------|--------------------|-----------------|
| <b>Sodium (mg)</b>                                    | Baseline | Control      | 155 | 3673.81 | 1812.82            | ref             |
|                                                       |          | Intervention | 149 | 3512.82 | 1765.59            |                 |
|                                                       | 6-month  | Control      | 104 | 3968.20 | 1725.17            | <b>0.003</b>    |
|                                                       |          | Intervention | 99  | 3354.72 | 1365.75            |                 |
|                                                       | 12-month | Control      | 90  | 4213.67 | 1972.37            | 0.138           |
|                                                       |          | Intervention | 86  | 3682.94 | 1874.53            |                 |
| <b>Combined fruit and vegetables (cup equivalent)</b> | Baseline | Control      | 155 | 2.50    | 1.98               | ref             |
|                                                       |          | Intervention | 149 | 2.34    | 2.02               |                 |
|                                                       | 6-month  | Control      | 104 | 2.57    | 1.89               | 0.639           |
|                                                       |          | Intervention | 99  | 2.43    | 1.75               |                 |
|                                                       | 12-month | Control      | 90  | 2.55    | 1.88               | 0.954           |
|                                                       |          | Intervention | 86  | 2.50    | 1.92               |                 |
| <b>Whole grain (ounces)</b>                           | Baseline | Control      | 155 | 0.85    | 1.41               | ref             |
|                                                       |          | Intervention | 149 | 0.61    | 1.05               |                 |
|                                                       | 6-month  | Control      | 104 | 1.12    | 1.62               | 0.278           |
|                                                       |          | Intervention | 99  | 0.88    | 1.49               |                 |
|                                                       | 12-month | Control      | 90  | 1.14    | 2.24               | 0.544           |
|                                                       |          | Intervention | 86  | 0.82    | 1.25               |                 |
| <b>Saturated fat (%kcal)</b>                          | Baseline | Control      | 155 | 12.54   | 4.32               | ref             |
|                                                       |          | Intervention | 149 | 11.91   | 4.19               |                 |
|                                                       | 6-month  | Control      | 104 | 13.12   | 6.56               | 0.979           |
|                                                       |          | Intervention | 99  | 12.97   | 4.62               |                 |
|                                                       | 12-month | Control      | 90  | 13.46   | 4.52               | 0.069           |
|                                                       |          | Intervention | 86  | 12.03   | 4.72               |                 |

Continuous variables are described by mean (sd) and tested with t- tests.

**eTable 3. Sensitivity Analyses**

| Measure          | Godin 6mo                         | Godin 12mo                       | Sodium 6mo                       | Sodium 12mo                      | Alcohol 6mo                      | Alcohol 12mo                    |
|------------------|-----------------------------------|----------------------------------|----------------------------------|----------------------------------|----------------------------------|---------------------------------|
| Clinic Systolic  | -3.24 (-9.88 to 3.40), p = 0.340  | 0.35 (-7.18 to 7.88), p = 0.928  | -0.55 (-2.39 to 1.29), p = 0.558 | -0.43 (-2.70 to 1.85), p = 0.714 | -0.10 (-0.65 to 0.46), p = 0.734 | 0.07 (-0.54 to 0.68), p = 0.829 |
| Clinic Diastolic | -1.21 (-6.15 to 3.73), p = 0.632  | -0.56 (-6.65 to 5.52), p = 0.856 | 0.02 (-1.35 to 1.39), p = 0.979  | 0.15 (-1.68 to 1.98), p = 0.874  | -0.04 (-0.46 to 0.39), p = 0.871 | 0.06 (-0.44 to 0.55), p = 0.823 |
| AMBP Systolic    | -5.10 (-10.47 to 0.28), p = 0.064 | -1.80 (-8.74 to 5.15), p = 0.613 | 0.61 (-0.90 to 2.12), p = 0.429  | -0.15 (-2.28 to 1.99), p = 0.891 | -0.40 (-0.85 to 0.05), p = 0.085 | 0.05 (-0.53 to 0.63), p = 0.868 |
| AMBP Diastolic   | -4.21 (-8.06 to -0.35), p = 0.034 | -3.60 (-8.48 to 1.28), p = 0.150 | 0.62 (-0.46 to 1.70), p = 0.261  | 1.02 (-0.47 to 2.51), p = 0.183  | -0.26 (-0.59 to 0.07), p = 0.123 | 0.10 (-0.31 to 0.51), p = 0.643 |

Listed results include are the coefficients, (95% CI), and p-value. The way our models are set up & the nature of the coefficients we used, the F-test p-value is the same as the interaction coefficient’s p-value.

The coefficients for sodium are per +1,000mg, alcohol is +1 drink/week so negative coefficients mean larger BP decrease with more sodium or more drinks. The Godin coefficient is the difference from active & inactive groups, so a negative coefficient means larger BP decrease in the inactive group.
