# Supplementary material for: Effect of a Telephone Health Coaching Intervention on Hypertension Control in Young Adults: The MyHEART Randomized Clinical Trial
Source: PubMed Central journal article supplement (PMC9898821; doi:10.1001/jamanetworkopen.2022.55618), 2023-02-03
Supplement: jamanetwopen-e2255618-s003.pdf [file jamanetwopen-e2255618-s003.pdf]

## Data Sharing Statement

Hoppe. Effect of a Telephone Health Coaching Intervention on Hypertension Control in Young Adults. *JAMA Netw Open*. Published February 03, 2023.

doi:10.1001/jamanetworkopen.2022.55618

### Data

**Data available:** No

### Additional Information

**Explanation for why data not available:** We are currently drafting other manuscripts with the data, it can be available upon request.
